# Supplementary material for: CuSbSe2/TiO2: novel type-II heterojunction nano-photocatalyst
Source: Royal Society of Chemistry journal article supplement (doi:10.1039/c8qm00537k), 2018-12-28
Supplement: c8qm00537k1.pdf [file c8qm00537k1.pdf]

## CuSbSe<sub>2</sub>/TiO<sub>2</sub>: Novel Type-II Heterojunction Nano-Photocatalyst

Anuraj S. Kshirsagar and Pawan K. Khanna\*

Nano Chemistry and Quantum Dots R & D Lab,  
Department of Applied Chemistry, Defence Institute of Advanced Technology (DIAT),  
Ministry of Defence, Govt. of India, Girinagar, Pune-411025, India.

\*Corresponding author: pawankhanna2002@yahoo.co.in

### Supplementary information

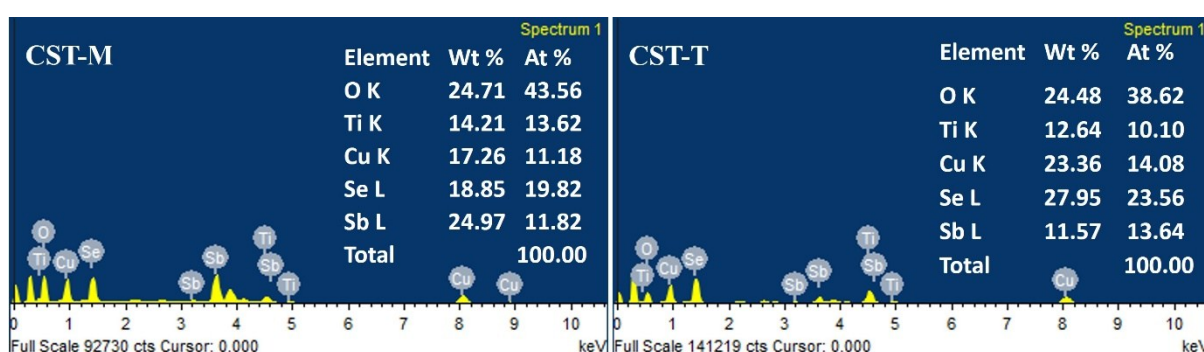

Figure S1. EDS analysis of CST-M and CST-T

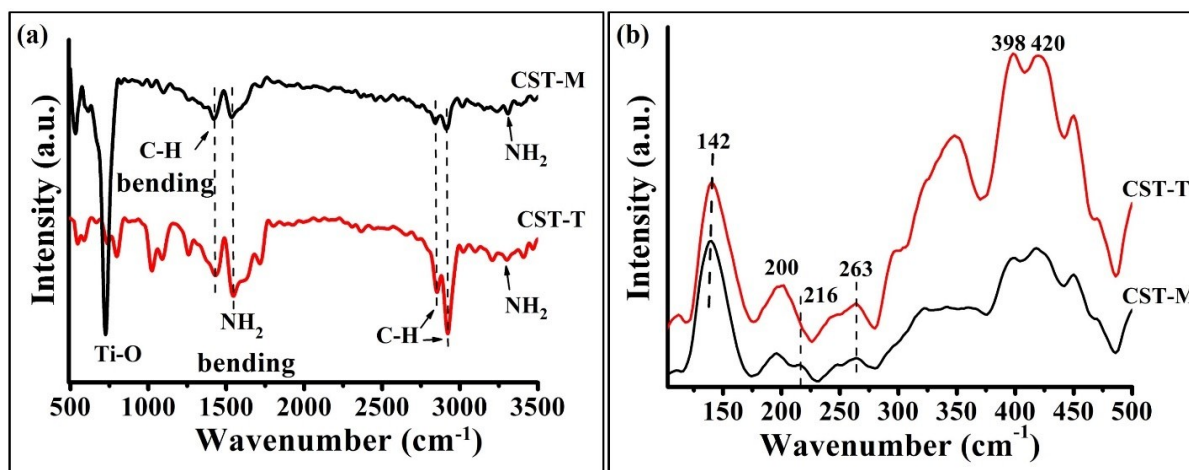

Figure S2. (a) FTIR and (b) Raman spectra of CST-M and CST-T

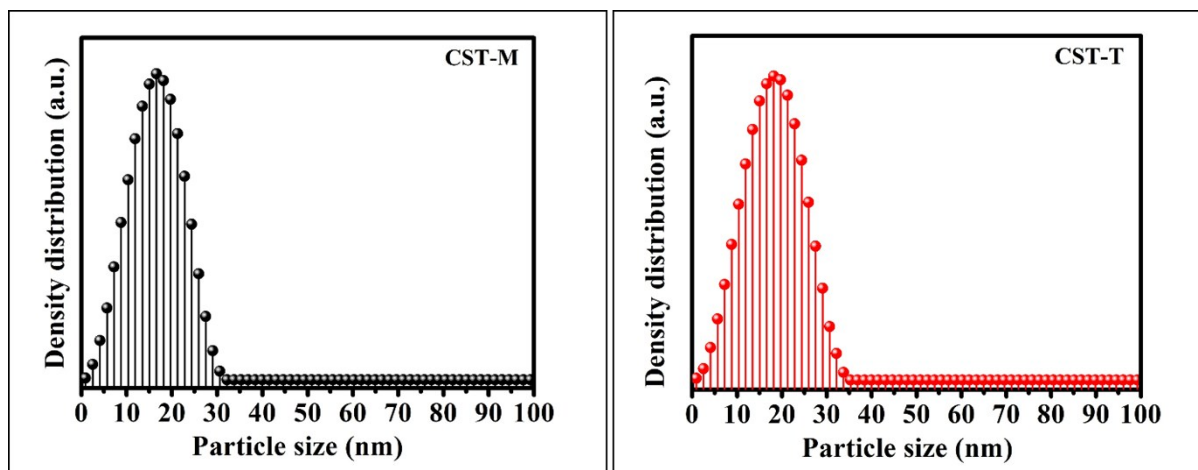

**Figure S3.** Particle size distribution of **CST-M** and **CST-T**
